# Supplementary material for: Passive Fire Protection of Taeda pine Wood by Using Starch-Based Surface Coatings
Source: MDPI journal article supplement (doi:10.3390/polym13213841), 2021-11-06
Supplement: s1 [file s1]

**Table S1:** The onset temperature ( $T_{\text{onset}}$ ) of the main degradation step, and char residues at 800 °C measured trough TGA in nitrogen and in air atmospheres.

| Formulation                            | $T_{\text{onset}}$ in nitrogen<br>(°C) | Char residue<br>in nitrogen<br>(wt. %) | $T_{\text{onset}}$ in air<br>(°C) | Char residue<br>in air<br>(wt. %) |
|----------------------------------------|----------------------------------------|----------------------------------------|-----------------------------------|-----------------------------------|
| untreated                              | 217                                    | 18.5                                   | 235                               | 5.40                              |
| starch                                 | 242                                    | 15.6                                   | 232                               | 7.50                              |
| starch + $\text{Na}_2\text{CO}_3$      | 200                                    | 24.5                                   | 206                               | 10.9                              |
| starch + $\text{K}_2\text{CO}_3$       | 200                                    | 25.9                                   | 196                               | 14.5                              |
| starch + $(\text{NH}_4)_2\text{HPO}_4$ | 216                                    | 32.5                                   | 220                               | 4.90                              |

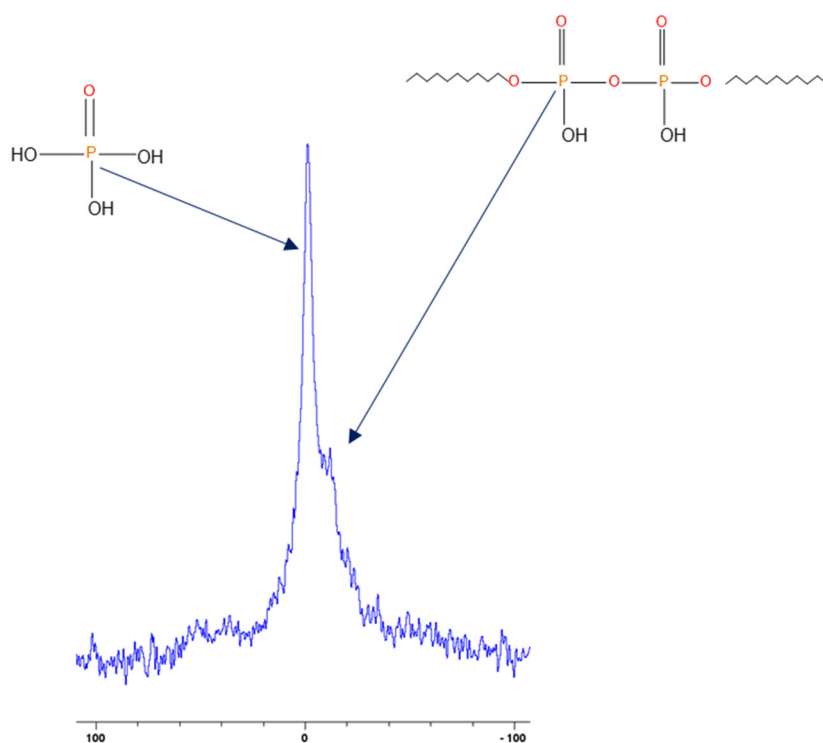

**Figure S1:** Solid-state  $^{31}\text{P}$  NMR spectrum of char obtained from wood coated with 'starch +  $(\text{NH}_4)_2\text{HPO}_4$ ' formulation (the abscissa denotes the chemical shift values,  $\delta$ , in ppm, and the ordinate corresponds to the signal intensity in arbitrary units).

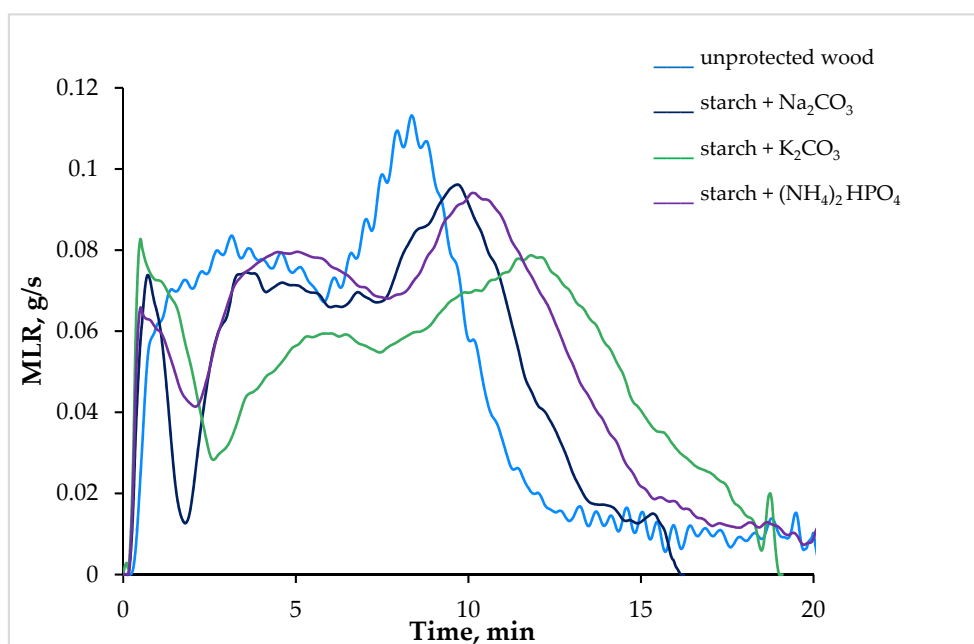

**Figure S2:** The MLR *vs.* time profiles of unprotected wood and the wood surfaces coated with starch + inorganic salt formulations.

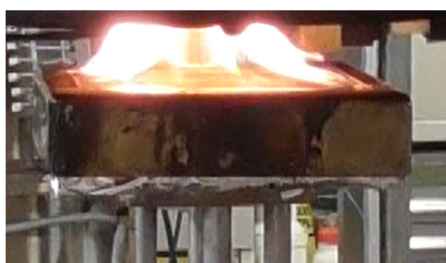

(a)

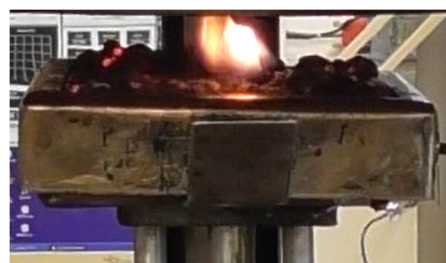

(b)

**Figure S3:** The snapshots taken from the videos recorded during cone calorimetry testing, 10 seconds after the ignition: (a) untreated wood; (b) wood coated with 'starch + K<sub>2</sub>CO<sub>3</sub>' formulation.

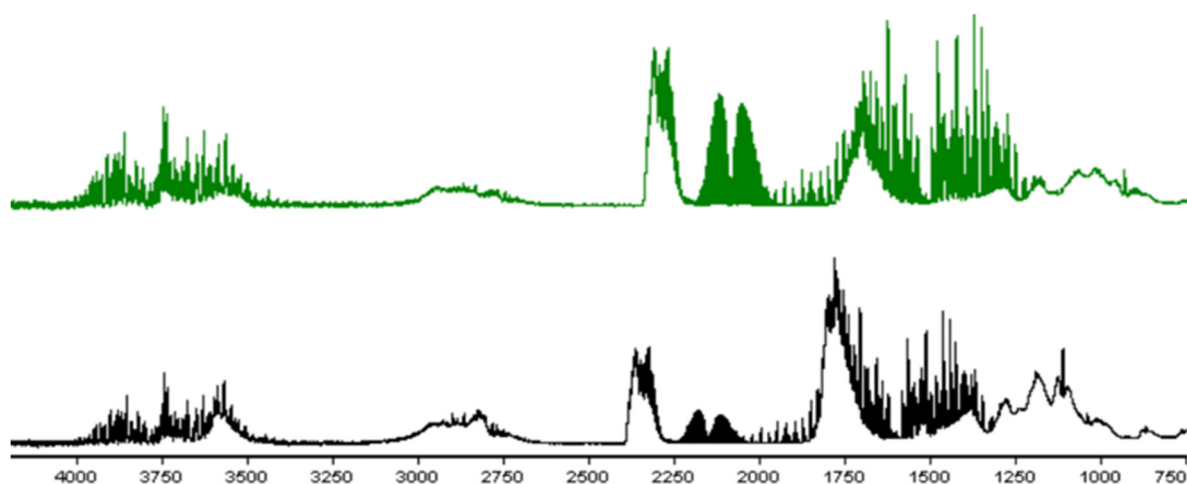

**Figure S4:** FT-IR spectra of gaseous products produced in the tube furnace during decomposition of untreated wood (black) and wood coated with 'starch + K<sub>2</sub>CO<sub>3</sub>' formulation (green), 350 °C, nitrogen atmosphere (the abscissa is wavenumber (in cm<sup>-1</sup>) and the ordinate is absorbance (in arbitrary units)).

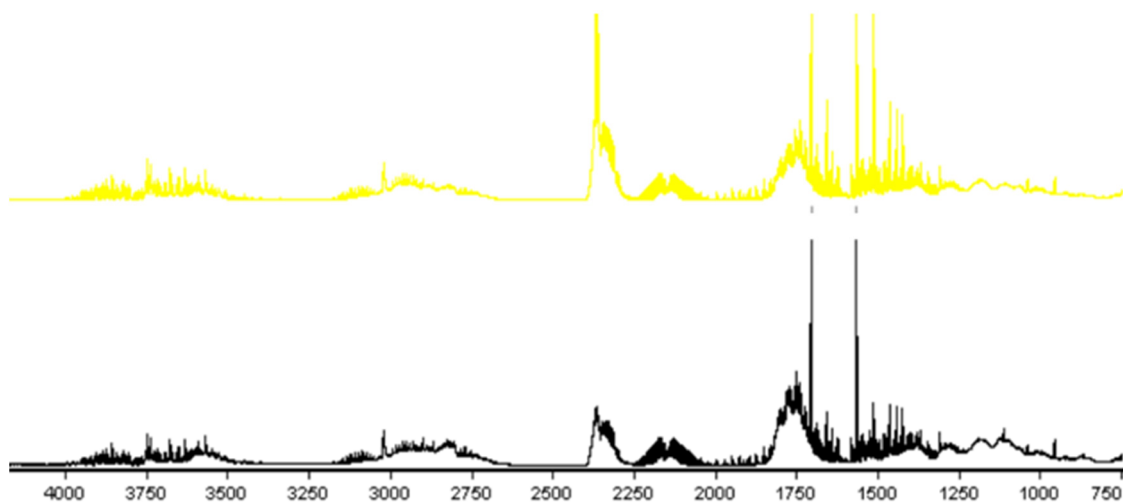

**Figure S5:** FT-IR spectra of gaseous products produced in the tube furnace during decomposition of untreated wood (black) and wood coated with 'starch + K<sub>2</sub>CO<sub>3</sub>' formulation (yellow), 650 °C, nitrogen atmosphere (the abscissa is wavenumber (in cm<sup>-1</sup>) and the ordinate is absorbance (in arbitrary units)).
